# Supplementary material for: Changes in the Phenolic Compounds of Hop (Humulus lupulus L.) Induced by Infection with Verticillium nonalfalfae, the Causal Agent of Hop Verticillium Wilt
Source: Plants (Basel). 2020 Jul 3;9(7):841. doi: 10.3390/plants9070841 (PMC7411879; doi:10.3390/plants9070841)
Supplement: Supplementary file 1 [file plants-09-00841-s001.xlsx]

## Sheet: Table S1
Table S1: Amount (µg/g) of flavanols in the roots (R) and stems (S) of susceptible (CE; Celeia) and resistant (WT; Wye Target) hop cultivars. Data are presented as mean ± SD. Data were analyzed by one-way ANOVA and Duncan’s post hoc test for root and stem samples, respectively. Different letters (bolded values) denote statistically significant differences between infected and control samples at p…
Flavanols	dpi	CE-R			WT-R			CE-S			WT-S
		C	I		C	I		C	I		C	I
Catechin	1	148,442 ± 126,499 cdef	173,307 ± 65,31 cde		22,766 ± 11,518 g	16,837 ± 12,506 g		52,932 ± 33,871 abc	69,816 ± 32,16 ab		10,065 ± 2,948 hij	13,988 ± 5,88 ghij
	3	168,601 ± 53,721 cde	201,067 ± 42,556 cd		39,686 ± 24,098 fg	58,983 ± 51,983 efg		48,864 ± 9,66 abc	82,973 ± 11,194 a		9,785 ± 0,879 ij	20,563 ± 8,395 efgh
	6	109,414 ± 40,396 defg	134,546 ± 128,753 defg		41,983 ± 18,031 fg	25,838 ± 13,131 g		30,851 ± 14,445 cde	39,434 ± 7,448 bcd		18,334 ± 10,92 fghi	7,003 ± 2,017 j
	15	326,498 ± 84,917 ab	358,49 ± 101,86 a		170,389 ± 21,879 cde	128,075 ± 18,488 defg		86,798 ± 2,508 a	61,685 ± 7,345 ab		24,556 ± 4,305 cdefg	21,079 ± 5,738 defg
	18	247,896 ± 74,62 bc	249,423 ± 101,735 abc		218,506 ± 36,858 bcd	138,062 ± 22,657 defg		67,905 ± 30,155 ab	68,251 ± 44,599 ab		28,075 ± 3,399 cdef	27,445 ± 6,774 cdefg
Epigallocatechin 2 (EPG2)	1	100,322 ± 32,364 ab	100,046 ± 24,129 a		46,65 ± 7,962 defgh	32,43 ± 5,367 gh		39,436 ± 11,877 cd	47,501 ± 11,234 bc		11,919 ± 2,511 j	17,338 ± 5,514 hij
	3	63,741 ± 12,893 bcdef	63,423 ± 23,418 cdef		28,445 ± 5,776 h	68,959 ± 29,448 abcdef		32,515 ± 9,5 de	56,256 ± 5,188 ab		12,115 ± 2,493 j	25,838 ± 6,355 efgh
	6	46,257 ± 14,228 efgh	76,659 ± 33,453 abcde		51,445 ± 20,646 defgh	67,201 ± 16,714 abcdef		21,574 ± 5,177 fghij	28,017 ± 6,07 efg		21,265 ± 9,211 fghij	14,395 ± 2,53 ij
	15	79,612 ± 8,349 abcd	91,716 ± 13,093 abc		72,707 ± 8,986 abcde	70,815 ± 25,603 abcdef		59,946 ± 1,703 a	46,078 ± 4,021 bc		22,122 ± 6,041 efghij	23,571 ± 3,239 efghi
	18	42,497 ± 12,313 fgh	60,357 ± 11,126 cdefg		76,857 ± 15,73 abcde	77,725 ± 7,885 abcde		20,962 ± 5,673 ghij	39,638 ± 2,989 cd		23,737 ± 3,144 efghi	31,095 ± 4,355 def
Epicatechin	1	6,272 ± 5,902 ef	6,694 ± 2,676 cde		1,662 ± 1,467 f	2,001 ± 0,815 ef		4,276 ± 0,827 abc	3,711 ± 0,162 bcde		1,215 ± 0,855 g	2,229 ± 0,471 defg
	3	5,613 ± 1,62 def	7,023 ± 0,829 cde		3,208 ± 1,957 ef	4,559 ± 6,159 ef		3,541 ± 0,771 bcde	5,731 ± 1,548 a		2,023 ± 1,164 fg	3,056 ± 1,059 cdef
	6	3,967 ± 1,82 ef	4,398 ± 5,456 ef		3,397 ± 1,479 ef	3,451 ± 2,299 ef		2,397 ± 0,406 defg	2,932 ± 1,675 cdef		3,242 ± 1,326 cdef	2,14 ± 0,355 efg
	15	19,91 ± 4,957 b	24,103 ± 5,603 b		58,11 ± 5,7 a	50,902 ± 7,08 a		5,151 ± 0,953 ab	4,827 ± 0,752 ab		2,96 ± 0,782 cdef	3,16 ± 0,151 cdef
	18	14,208 ± 4,544 bcd	15,686 ± 7,223 bc		65,391 ± 13,266 a	47,735 ± 13,01 a		2,386 ± 0,581 defg	5,915 ± 1,411 a		2,933 ± 0,087 cdef	3,823 ± 0,257 bcd
Epigallocatechin derivative	1	38,877 ± 30,149 cdef	44,244 ± 16,086 bcde		5,646 ± 4,876 h	5,583 ± 1,166 h		87,777 ± 24,806 defghi	138,043 ± 26,046 abc		42,552 ± 5,003 k	70,352 ± 17,509 fghij
	3	42,394 ± 9,82 bcde	57,906 ± 10,748 abc		8,648 ± 5,966 gh	29,301 ± 22,66 defg		63,456 ± 16,025 ghij	126,289 ± 18,656 abcd		42,162 ± 11,093 k	124,96 ± 22,576 abcd
	6	17,972 ± 7,505 efgh	39,174 ± 26,178 cdef		22,18 ± 13,944 defgh	14,307 ± 5,409 fgh		53,65 ± 20,379 jk	90,072 ± 21,469 defg		68,488 ± 23,329 ghij	62,529 ± 20,548 hijk
	15	75,663 ± 12,853 ab	77,68 ± 14,721 ab		80,57 ± 11,162 ab	75,99 ± 13,575 ab		113,383 ± 22,229 bcde	152,258 ± 21,114 ab		57,388 ± 5,792 ijk	80,397 ± 14,019 efghi
	18	36,674 ± 12,581 cdef	51,468 ± 26,139 bcd		100,261 ± 21,763 a	65,257 ± 20,742 abc		99,27 ± 7,385 cdef	173,344 ± 46,335 a		69,13 ± 15,821 ghij	86,713 ± 10,228 defgh
Procyanidin dimer	1	328,588 ± 238,37 defgh	443,943 ± 145,186 bcdef		108,259 ± 47,24 ij	90,528 ± 21,259 j		159,559 ± 30,163 efg	292,188 ± 61,417 abc		167,075 ± 41,112 efg	168,854 ± 42,027 efg
	3	375,151 ± 96,986 cdefg	495,755 ± 93,432 abcde		134,988 ± 59,195 hij	280,324 ± 189,73 fghij		181,232 ± 19,059 efg	305,035 ± 14,007 ab		119,119 ± 31,397 fg	198,756 ± 51,58 de
	6	261,81 ± 113,721 fghij	323,644 ± 250,897 efghi		253,033 ± 47,273 fghij	170,575 ± 80,993 ghij		190,367 ± 16,318 e	271,348 ± 32,905 abcd		198,241 ± 103,581 ef	115,213 ± 21,491 g
	15	559,451 ± 124,359 abcd	680,833 ± 86,903 a		513,559 ± 103,567 abcde	539,921 ± 65,266 abcde		359,043 ± 25,233 a	300,926 ± 42,324 ab		176,998 ± 47,7 efg	208,065 ± 75,916 cde
	18	431,778 ± 114,371 bcdef	547,806 ± 175,003 abcde		624,11 ± 84,492 ab	587,987 ± 82,145 abc		174,291 ± 5,177 efg	198,248 ± 9,351 cde		221,574 ± 72,807 bcde	215,915 ± 57,507 bcde
Procyanidin trimer	1	265,977 ± 169,807 cde	290,53 ± 100,086 bcde		68,942 ± 26,732 g	71,351 ± 12,996 g		393,519 ± 48,108 bcdef	534,889 ± 143,338 abc		150,999 ± 37,575 i	219,747 ± 74,695 ghi
	3	266,628 ± 85,009 bcde	329,415 ± 87,994 bc		93,553 ± 28,996 fg	194,754 ± 135,44 defg		411,1 ± 68,627 bcde	682,947 ± 54,679 a		162,455 ± 21,568 hi	299,246 ± 84,34 efg
	6	200 ± 81,865 cdef	224,943 ± 150,873 cdef		157,604 ± 18,196 defg	143,111 ± 63,444 efg		267,448 ± 97,005 fgh	338,053 ± 65,974 def		228,391 ± 120,31 ghi	160,079 ± 24,205 hi
	15	573,294 ± 120,276 a	570,98 ± 146,306 a		350,994 ± 31,338 bc	295,362 ± 15,184 bcd		698,791 ± 28,458 a	559,547 ± 75,632 ab		348,477 ± 24,436 def	317,388 ± 47,895 efg
	18	256,742 ± 11,619 cde	329,867 ± 131,591 bcd		458,697 ± 36,885 ab	319,832 ± 25,589 bcd		479,472 ± 185,553 bcd	472,401 ± 91,116 bcd		363,728 ± 35,906 cdef	376,365 ± 65,3 cdef
Procyanidin tetramer	1	39,527 ± 20,206 defg	40,418 ± 19,331 cdefg		7,272 ± 4,437 h	7,651 ± 1,968 h		NOT DETECTED
	3	41,823 ± 20,406 cdef	34,644 ± 7,758 defg		15,166 ± 7,371 gh	34,189 ± 24,253 efg
	6	37,63 ± 10,422 defg	22,283 ± 19,669 fgh		35,393 ± 21,992 defg	17,841 ± 7,323 fgh
	15	79,067 ± 30,14 bc	62,023 ± 10,982 bcde		96,171 ± 8,305 ab	66,408 ± 19,202 bcd
	18	39,385 ± 18,472 defg	35,469 ± 17,376 defg		137,304 ± 13,232 a	85,172 ± 45,508 bc
Epigallocatechin 1 (EPG1)	1	NOT DETECTED						12,916 ± 3,686 efg	19,887 ± 1,532 cde		7,105 ± 2,972 g	12,894 ± 4,699 efg
	3							16,034 ± 7,815 ef	35,661 ± 8,782 ab		7,213 ± 4,565 g	13,099 ± 6,712 efg
	6							11,969 ± 6,274 efg	19,04 ± 5,957 cde		15,955 ± 5,261 ef	9,124 ± 1,927 fg
	15							28,623 ± 7,771 bcd	13,414 ± 6,115 efg		16,993 ± 7,941 ef	30,821 ± 9,298 abc
	18							17,909 ± 4,751 def	29,376 ± 8,623 bc		21,664 ± 4,923 bcde	42,684 ± 4,728 a
Total analyzed flavanols	1	928,122 ± 619,143 defgh	1099,372 ± 354,291 def		261,438 ± 89,694 i	226,474 ± 48,925 i		750,415 ± 100,383 def	1106,034 ± 270,867 abc		390,93 ± 90,817 ij	505,402 ± 141,303 ghij
	3	964,016 ± 272,022 defgh	1189,34 ± 254,107 cde		323,836 ± 129,857 i	862,674 ± 289,706 defgh		756,74 ± 114,345 def	1294,892 ± 96,069 a		354,873 ± 66,906 j	685,518 ± 144,437 efgh
	6	677,18 ± 254,88 fghi	825,731 ± 590,241 efgh		565,256 ± 128,255 ghi	442,474 ± 162,586 hi		578,256 ± 156,344 fghij	788,897 ± 127,812 def		462,724 ± 172,591 hij	370,483 ± 63,639 j
	15	1713,594 ± 89,648 ab	1865,939 ± 255,98 a		1342,655 ± 161,092 bcd	1227,618 ± 101,533 bcde		1351,736 ± 77,387 a	1138,736 ± 124,654 ab		649,494 ± 90,947 efghi	684,482 ± 117,656 efgh
	18	1069,274 ± 225,095 defg	1290,235 ± 449,12 bcde		1681,348 ± 197,737 abc	1321,898 ± 193,654 bcde		862,194 ± 221,483 cde	987,172 ± 161,165 bcd		730,84 ± 130,295 efg	784,039 ± 138,125 def

## Sheet: Table S1.1
Table S1.1: Fold changes (infected/control) of flavanols in the roots (R) and stems (S) of susceptible (CE; Celeia) and resistant (WT; Wye Target) hop cultivars. Data were analyzed by one-way ANOVA and Duncan’s post hoc test for root and stem samples, respectively. Different letters (bolded values) denote statistically significant differences between hop cultivars or sampling times (dpi) at p ≤ 0…
Flavanols	dpi	CE-R	WT-R		CE-S	WT-S
Catechin	1	1,168 ± 0,44 a	0,74 ± 0,549 a		1,319 ± 0,608 abcd	1,39 ± 0,584 abc
	3	1,193 ± 0,252 a	1,486 ± 1,31 a		1,698 ± 0,229 ab	2,101 ± 0,858 a
	6	1,23 ± 1,177 a	0,615 ± 0,313 a		1,278 ± 0,241 abc	0,382 ± 0,11 e
	15	1,098 ± 0,312 a	0,752 ± 0,109 a		0,711 ± 0,085 d	0,858 ± 0,234 cd
	18	1,006 ± 0,41 a	0,632 ± 0,104 a		1,005 ± 0,657 cd	0,978 ± 0,241 bcd
Epigallocatechin 2 (EPG2)	1	0,997 ± 0,241 bcd	0,695 ± 0,115 d		1,204 ± 0,285 d	1,455 ± 0,463 bcd
	3	0,995 ± 0,367 bcd	2,424 ± 1,035 a		1,73 ± 0,16 abc	2,133 ± 0,525 a
	6	1,657 ± 0,723 bc	1,306 ± 0,325 bc		1,299 ± 0,281 d	0,677 ± 0,119 e
	15	1,152 ± 0,164 bcd	0,974 ± 0,352 cd		0,769 ± 0,067 e	1,066 ± 0,146 d
	18	1,42 ± 0,262 b	1,011 ± 0,103 bcd		1,891 ± 0,143 ab	1,31 ± 0,183 cd
Epicatechin	1	1,067 ± 0,427 abc	1,204 ± 0,491 a		0,868 ± 0,038 de	1,834 ± 0,388 ab
	3	1,251 ± 0,148 a	1,421 ± 1,92 bc		1,619 ± 0,437 abc	1,511 ± 0,524 bc
	6	1,109 ± 1,375 c	1,016 ± 0,677 abc		1,223 ± 0,699 cd	0,66 ± 0,11 e
	15	1,211 ± 0,281 a	0,876 ± 0,122 abc		0,937 ± 0,146 de	1,067 ± 0,051 cd
	18	1,104 ± 0,508 ab	0,73 ± 0,199 abc		2,479 ± 0,591 a	1,303 ± 0,088 bcd
Epigallocatechin derivative	1	1,138 ± 0,414 ab	0,989 ± 0,207 ab		1,573 ± 0,297 bc	1,653 ± 0,411 bc
	3	1,366 ± 0,254 ab	3,388 ± 2,62 b		1,99 ± 0,294 b	2,964 ± 0,535 a
	6	2,18 ± 1,457 ab	0,645 ± 0,244 a		1,679 ± 0,4 bc	0,913 ± 0,3 d
	15	1,027 ± 0,195 ab	0,943 ± 0,168 a		1,343 ± 0,186 cd	1,401 ± 0,244 cd
	18	1,403 ± 0,713 ab	0,651 ± 0,207 a		1,746 ± 0,467 bc	1,254 ± 0,148 cd
Procyanidin dimer	1	1,351 ± 0,442 b	0,836 ± 0,196 b		1,831 ± 0,385 a	1,011 ± 0,252 bc
	3	1,321 ± 0,249 b	2,077 ± 1,406 a		1,683 ± 0,077 a	1,669 ± 0,433 a
	6	1,236 ± 0,958 b	0,674 ± 0,32 b		1,425 ± 0,173 ab	0,581 ± 0,108 d
	15	1,217 ± 0,155 b	1,051 ± 0,127 b		0,838 ± 0,118 cd	1,176 ± 0,429 bc
	18	1,269 ± 0,405 b	0,942 ± 0,132 b		1,137 ± 0,054 bc	0,974 ± 0,26 cd
Procyanidin trimer	1	1,092 ± 0,376 bc	1,035 ± 0,189 bc		1,359 ± 0,364 bcd	1,455 ± 0,495 abc
	3	1,235 ± 0,33 bc	2,082 ± 1,448 a		1,661 ± 0,133 ab	1,842 ± 0,519 a
	6	1,125 ± 0,754 bc	0,908 ± 0,403 bc		1,264 ± 0,247 bcd	0,701 ± 0,106 e
	15	0,996 ± 0,255 bc	0,842 ± 0,043 bc		0,801 ± 0,108 e	0,911 ± 0,137 de
	18	1,285 ± 0,513 b	0,697 ± 0,056 c		0,985 ± 0,19 cde	1,035 ± 0,18 cde
Procyanidin tetramer	1	1,023 ± 0,489 bc	1,052 ± 0,271 b		NOT DETECTED
	3	0,828 ± 0,185 bc	2,254 ± 1,599 a
	6	0,592 ± 0,523 bc	0,504 ± 0,207 c
	15	0,784 ± 0,139 bc	0,691 ± 0,2 bc
	18	0,901 ± 0,441 bc	0,62 ± 0,331 bc
Epigallocatechin 1 (EPG1)	1	NOT DETECTED			1,54 ± 0,119 a	1,815 ± 0,661 a
	3				2,224 ± 0,548 a	1,816 ± 0,93 a
	6				1,591 ± 0,498 a	0,572 ± 0,121 b
	15				0,469 ± 0,214 b	1,814 ± 0,547 a
	18				1,64 ± 0,481 a	1,97 ± 0,218 a
Total analyzed flavanols	1	1,185 ± 0,382 b	0,866 ± 0,187 b		1,474 ± 0,361 bc	1,293 ± 0,361 cd
	3	1,234 ± 0,264 b	2,664 ± 0,895 a		1,711 ± 0,127 ab	1,932 ± 0,407 a
	6	1,219 ± 0,872 b	0,783 ± 0,288 b		1,364 ± 0,221 bcd	0,669 ± 0,115 f
	15	1,089 ± 0,149 b	0,914 ± 0,076 b		0,842 ± 0,092 ef	1,054 ± 0,181 de
	18	1,207 ± 0,42 b	0,786 ± 0,115 b		1,145 ± 0,187 cde	1,073 ± 0,189 cde

## Sheet: Table S2
Table S2: Amount (µg/g) of flavonol derivatives in the stem tissues of susceptible (CE-S; Celeia stems) and resistant (WT-S; Wye Target stems) hop cultivars. Data were analyzed by one-way ANOVA and Duncan’s post hoc test. Data are presented as mean ± SD. Different letters (bolded values) denote statistically significant differences between infected and control samples at p ≤ 0.05.
Flavonol derivatives	dpi	CE-S			WT-S
		C	I		C	I
Kaempferol acetyl hexoside	1	61,3 ± 17,802 ab	55,807 ± 10,049 abc		6,972 ± 2,152 efg	4,661 ± 1,405 g
	3	50,562 ± 21,942 bc	83,949 ± 13,92 a		6,988 ± 1,347 efg	8,237 ± 3,499 efg
	6	27,096 ± 6,454 d	42,188 ± 22,54 bcd		8,011 ± 2,197 efg	6,748 ± 1,205 efg
	15	48,095 ± 12,15 bc	50,427 ± 14,369 abc		9,918 ± 1,243 e	5,147 ± 1,444 fg
	18	34,609 ± 15,98 cd	52,741 ± 15,816 abc		8,761 ± 3,497 ef	8,944 ± 1,526 e
Kaempferol acetyl rutinoside	1	31,876 ± 10,236 abc	41,438 ± 12,834 abc		33,067 ± 8,004 abc	25,431 ± 6,874 c
	3	25,553 ± 5,488 c	35,715 ± 12,236 abc		42,944 ± 2,023 ab	35,834 ± 8,774 abc
	6	30,033 ± 9,059 abc	32,274 ± 9,749 abc		39,777 ± 7,109 abc	33,5 ± 8,773 abc
	15	36,141 ± 9,76 abc	46,114 ± 11,324 a		36,338 ± 9,393 abc	26,675 ± 5,504 bc
	18	30,612 ± 12,399 abc	31,924 ± 13,185 abc		32,679 ± 12,293 abc	39,408 ± 4,227 abc
Kaempferol hexoside	1	1,594 ± 0,512 abc	2,072 ± 0,642 ab		1,653 ± 0,4 abc	1,272 ± 0,344 c
	3	1,278 ± 0,274 c	1,786 ± 0,612 abc		2,147 ± 0,101 ab	1,792 ± 0,439 abc
	6	1,502 ± 0,453 bc	1,614 ± 0,487 abc		1,989 ± 0,355 abc	1,675 ± 0,439 abc
	15	1,807 ± 0,488 abc	2,306 ± 0,566 a		1,817 ± 0,47 abc	1,334 ± 0,275 bc
	18	1,531 ± 0,62 bc	1,596 ± 0,659 abc		1,634 ± 0,615 abc	1,97 ± 0,211 abc
Kaempferol hexosyl dirhamnoside	1	29,578 ± 5,334 abcd	38,022 ± 12,468 ab		19,009 ± 1,94 cde	16,343 ± 2,611 e
	3	21,193 ± 6,524 cde	31,126 ± 12,067 abcd		23,905 ± 2,705 bcde	20,024 ± 5,924 cde
	6	28,009 ± 8,864 abcde	29,154 ± 11,224 abcde		24,376 ± 5,265 bcde	20,034 ± 5,217 cde
	15	33,565 ± 14,194 abc	43,674 ± 9,297 a		18,136 ± 3,915 de	16,614 ± 1,263 de
	18	27,568 ± 13,282 abcde	29,831 ± 14,415 abcde		16,479 ± 4,463 e	20,202 ± 2,73 cde
Kaempferol hexosyl rutinoside	1	40,498 ± 7,226 ab	35,401 ± 8,971 abc		8,806 ± 2,283 de	7,169 ± 1,883 e
	3	27,797 ± 7,826 bc	47,497 ± 6,927 a		10,802 ± 1,872 de	11,208 ± 2,311 d
	6	23,886 ± 5,758 c	26,761 ± 5,931 bc		13,476 ± 2,722 d	9,555 ± 1,805 de
	15	30,3 ± 7,591 abc	38,847 ± 8,417 ab		9,708 ± 2,068 de	8,682 ± 2,282 de
	18	27,383 ± 14,246 bc	38,58 ± 16,325 abc		8,604 ± 2,035 de	11,951 ± 1,801 d
Kaempferol glycosides	1	164,845 ± 17,742 abc	172,738 ± 24,656 ab		69,507 ± 13,854 hi	54,876 ± 10,624 i
	3	115,257 ± 13,177 def	200,073 ± 27,652 a		86,786 ± 2,808 fghi	77,094 ± 19,069 ghi
	6	110,525 ± 24,004 defg	131,99 ± 27,664 cde		87,629 ± 14,95 fghi	71,513 ± 17,113 hi
	15	137,463 ± 16,85 bcde	181,367 ± 35,413 a		75,917 ± 17,024 ghi	58,452 ± 8,646 i
	18	107,782 ± 15,658 efgh	143,15 ± 44,521 bcd		68,157 ± 21,981 i	82,476 ± 7,893 fghi
Myricetin-3-rutinoside	1	2,379 ± 1,425 abc	1,953 ± 1,649 abc		1,895 ± 1,261 abc	2,739 ± 0,971 ab
	3	1,054 ± 0,089 c	2,731 ± 0,513 ab		1,108 ± 0,551 c	2,711 ± 1,054 ab
	6	1,44 ± 0,686 bc	1,82 ± 0,428 abc		1,872 ± 0,362 abc	2,081 ± 0,905 abc
	15	3,18 ± 1,521 ab	3,312 ± 0,423 a		1,851 ± 0,222 abc	2,378 ± 1,165 abc
	18	2,465 ± 1,77 abc	3,068 ± 1,299 ab		1,88 ± 0,21 abc	1,875 ± 1,294 abc
Quercetin-3-glucoside (Isoquercitin)	1	4,507 ± 2,758 e	5,958 ± 2,129 e		16,754 ± 4,738 bcd	15,924 ± 5,463 cd
	3	3,234 ± 1,211 e	5,032 ± 1,631 e		20,684 ± 4,896 abcd	23,267 ± 6,47 a
	6	4,566 ± 1,275 e	4,551 ± 1,59 e		22,05 ± 8,454 abc	15,773 ± 2,339 d
	15	5,542 ± 1,215 e	6,273 ± 1,944 e		19,875 ± 2,706 abcd	16,323 ± 1,593 cd
	18	5,12 ± 2,047 e	4,563 ± 2,197 e		19,423 ± 5,735 abcd	22,686 ± 3,302 ab
Quercetin-3-rutinoside (Rutin)	1	37,736 ± 9,633 ab	34,678 ± 13,392 ab		6,202 ± 1,423 de	7,692 ± 2,603 de
	3	30,864 ± 15,625 ab	43,116 ± 7,077 a		8,337 ± 0,719 de	10,211 ± 5,145 de
	6	33,549 ± 10,274 ab	27,872 ± 4,291 ab		11,543 ± 5,355 cd	5,862 ± 1,174 e
	15	33,792 ± 22,191 ab	33,395 ± 9,73 ab		7,412 ± 1,954 de	5,849 ± 0,37 de
	18	23,913 ± 15,29 bc	29,274 ± 14,946 ab		8,002 ± 2,173 de	7,637 ± 1,729 de
Quercetin acetyl hexoside	1	26,043 ± 5,76 a	21,869 ± 6,575 ab		6,611 ± 1,966 f	6,27 ± 1,94 f
	3	16,26 ± 6,609 bc	25,932 ± 3,693 a		7,298 ± 0,78 f	10,86 ± 6,977 cdef
	6	13,343 ± 1,279 bcde	14,727 ± 3,404 bc		9,763 ± 4,116 def	7,049 ± 0,884 f
	15	17,809 ± 4,643 ab	20,783 ± 4,646 ab		9,041 ± 0,396 def	5,972 ± 0,841 f
	18	15,219 ± 6,345 bcd	19,816 ± 7,246 ab		8,79 ± 1,959 ef	9,354 ± 1,582 cdef
Quercetin acetyl rutinoside	1	9,222 ± 3,247 a	7,443 ± 4,223 a		0,449 ± 0,055 cde	1,248 ± 0,763 c
	3	4,705 ± 2,66 a	7,835 ± 1,512 a		1,302 ± 0,864 c	1,058 ± 0,579 c
	6	5,396 ± 0,974 a	3,938 ± 0,896 a		1,256 ± 0,482 bc	1,128 ± 0,907 cd
	15	5,572 ± 2,245 a	6,301 ± 1,581 a		0,367 ± 0,279 ef	0,38 ± 0,315 def
	18	4,305 ± 3,176 ab	6,898 ± 3,232 a		0,223 ± 0,114 ef	0,151 ± 0,159 f
Quercetin hexosyl dirhamnoside	1	14,997 ± 4,431 bc	18,205 ± 6,527 ab		17,253 ± 2,677 ab	18,177 ± 3,49 ab
	3	10,355 ± 3,16 c	16,302 ± 5,61 abc		20,417 ± 3,342 ab	23,005 ± 3,655 ab
	6	15,082 ± 3,348 abc	15,841 ± 6,424 abc		24,187 ± 7,843 ab	17,922 ± 3,514 ab
	15	19,439 ± 8,532 ab	19,421 ± 3,801 ab		20,385 ± 1,915 ab	21,252 ± 2,603 ab
	18	15,756 ± 8,021 bc	15,846 ± 7,249 bc		20,061 ± 3,51 ab	24,325 ± 3,407 a
Quercetin rhamnosyl hexoside	1	1,035 ± 0,187 abcd	1,331 ± 0,436 ab		0,665 ± 0,068 def	0,572 ± 0,091 ef
	3	0,742 ± 0,228 cdef	1,089 ± 0,422 abcd		0,837 ± 0,095 bcdef	0,701 ± 0,207 def
	6	0,98 ± 0,31 abcdef	1,02 ± 0,393 abcdef		0,853 ± 0,184 bcdef	0,701 ± 0,183 def
	15	1,175 ± 0,497 abc	1,529 ± 0,325 a		0,635 ± 0,137 def	0,581 ± 0,044 def
	18	0,965 ± 0,465 bcdef	1,044 ± 0,504 abcde		0,577 ± 0,156 df	0,707 ± 0,096 cdef
Quercetin glycosides	1	93,541 ± 19,319 ab	82,373 ± 19,309 abcd		47,934 ± 9,305 g	49,883 ± 11,918 fg
	3	50,073 ± 11,57 fg	99,307 ± 15,723 a		58,875 ± 8,194 efg	60,926 ± 5,993 defg
	6	72,915 ± 9,792 bcde	67,949 ± 7,632 cdefg		69,653 ± 24,873 bcdef	48,435 ± 7,105 g
	15	63,535 ± 4,624 defg	87,702 ± 19,829 abc		57,713 ± 5,405 efg	50,357 ± 3,778 efg
	18	52,36 ± 13,764 efg	65,358 ± 19,114 cdefg		57,075 ± 12,806 efg	64,859 ± 9,527 cdefg
Total analyzed flavonol derivatives	1	260,765 ± 35,493 ab	257,065 ± 44,283 abc		119,336 ± 23,388 ij	107,499 ± 22,467 j
	3	177,511 ± 32,085 defgh	302,11 ± 40,238 a		146,769 ± 6,91 fghij	140,73 ± 19,426 fghij
	6	184,88 ± 30,526 defg	201,759 ± 23,943 cde		159,154 ± 30,11 defghij	122,03 ± 19,859 hij
	15	194,443 ± 13,733 def	272,381 ± 54,863 a		135,481 ± 22,254 ghij	111,187 ± 10,429 j
	18	161,776 ± 29,311 defghi	211,576 ± 63,295 bcd		127,112 ± 34,89 ghij	149,21 ± 17,09 efghij

## Sheet: Table S2.1
Table S2.1: Fold changes (infected/control) of flavonol derivatives in the stems (S) of susceptible (CE; Celeia) and resistant (WT; Wye Target) hop cultivars. Data were analyzed by one-way ANOVA and Duncan’s post hoc test. Different letters (bolded values) denote statistically significant differences between hop cultivars or sampling times (dpi) at p ≤ 0.05. Data are presented as mean ± SD.
Flavonol derivatives	dpi	CE-S		WT-S
Kaempferol acetyl hexoside	1	0,91 ± 0,164 cde		0,669 ± 0,202 de
	3	1,66 ± 0,275 a		1,179 ± 0,501 abcd
	6	1,557 ± 0,832 ab		0,842 ± 0,15 de
	15	1,048 ± 0,299 bcde		0,519 ± 0,146 e
	18	1,524 ± 0,457 abc		1,021 ± 0,174 bcde
Kaempferol acetyl rutinoside	1	1,3 ± 0,403 ab		0,769 ± 0,208 cd
	3	1,398 ± 0,479 a		0,834 ± 0,204 bcd
	6	1,075 ± 0,325 abcd		0,842 ± 0,221 bcd
	15	1,276 ± 0,313 ab		0,734 ± 0,151 d
	18	1,043 ± 0,431 abcd		1,206 ± 0,129 abc
Kaempferol hexoside	1	1,3 ± 0,403 ab		0,769 ± 0,208 cd
	3	1,398 ± 0,479 a		0,834 ± 0,204 bcd
	6	1,075 ± 0,325 abcd		0,842 ± 0,221 bcd
	15	1,276 ± 0,313 ab		0,734 ± 0,151 d
	18	1,043 ± 0,431 abcd		1,206 ± 0,129 abc
Kaempferol hexosyl dirhamnoside	1	1,285 ± 0,422 ab		0,86 ± 0,137 b
	3	1,469 ± 0,569 a		0,838 ± 0,248 b
	6	1,041 ± 0,401 ab		0,822 ± 0,214 b
	15	1,301 ± 0,277 ab		0,916 ± 0,07 ab
	18	1,082 ± 0,523 ab		1,226 ± 0,166 ab
Kaempferol hexosyl rutinoside	1	0,874 ± 0,222 cd		0,814 ± 0,214 d
	3	1,709 ± 0,249 a		1,038 ± 0,214 bcd
	6	1,12 ± 0,248 bcd		0,709 ± 0,134 d
	15	1,282 ± 0,278 abc		0,894 ± 0,235 cd
	18	1,409 ± 0,596 ab		1,389 ± 0,209 ab
Kaempferol glycosides	1	1,048 ± 0,15 bcd		0,789 ± 0,153 d
	3	1,736 ± 0,24 a		0,888 ± 0,22 cd
	6	1,194 ± 0,25 bc		0,816 ± 0,195 d
	15	1,319 ± 0,258 ab		0,77 ± 0,114 d
	18	1,328 ± 0,413 ab		1,21 ± 0,116 bc
Myricetin-3-rutinoside	1	0,821 ± 0,693 b		1,446 ± 0,512 b
	3	2,59 ± 0,487 a		2,446 ± 0,951 a
	6	1,264 ± 0,297 b		1,112 ± 0,484 b
	15	1,041 ± 0,133 b		1,285 ± 0,63 b
	18	1,244 ± 0,527 b		0,997 ± 0,688 b
Quercetin-3-glucoside (Isoquercitin)	1	1,322 ± 0,472 ab		0,95 ± 0,326 cd
	3	1,556 ± 0,504 a		1,125 ± 0,313 bcd
	6	0,997 ± 0,348 cd		0,715 ± 0,106 d
	15	1,132 ± 0,351 bcd		0,821 ± 0,08 cd
	18	0,891 ± 0,429 cd		1,168 ± 0,17 abc
Quercetin-3-rutinoside (Rutin)	1	0,919 ± 0,355 b		1,24 ± 0,42 ab
	3	1,397 ± 0,229 a		1,225 ± 0,617 b
	6	0,831 ± 0,128 b		0,508 ± 0,102 c
	15	0,988 ± 0,288 ab		0,789 ± 0,05 b
	18	1,224 ± 0,625 ab		0,954 ± 0,216 ab
Quercetin acetyl hexoside	1	0,84 ± 0,252 cde		0,948 ± 0,293 bcde
	3	1,595 ± 0,227 a		0,853 ± 0,327 cde
	6	1,104 ± 0,255 bcd		0,722 ± 0,091 de
	15	1,167 ± 0,261 abc		0,661 ± 0,093 e
	18	1,302 ± 0,476 ab		1,064 ± 0,18 bcde
Quercetin acetyl rutinoside	1	0,807 ± 0,458 bcd		2,779 ± 1,7 a
	3	1,665 ± 0,321 ab		0,812 ± 0,444 bcd
	6	0,73 ± 0,166 cd		0,898 ± 0,722 bcd
	15	1,131 ± 0,284 bcd		1,038 ± 0,861 bcd
	18	1,602 ± 0,751 abc		0,675 ± 0,712 d
Quercetin hexosyl dirhamnoside	1	1,214 ± 0,435 ab		1,054 ± 0,202 bcd
	3	1,574 ± 0,542 a		1,127 ± 0,179 abc
	6	1,05 ± 0,426 cd		0,741 ± 0,145 d
	15	0,999 ± 0,196 bcd		1,043 ± 0,128 bcd
	18	1,006 ± 0,46 bcd		1,213 ± 0,17 abc
Quercetin rhamnosyl hexoside	1	1,285 ± 0,422 ab		0,86 ± 0,137 ab
	3	1,469 ± 0,569 ab		0,838 ± 0,248 ab
	6	1,041 ± 0,401 ab		0,822 ± 0,214 b
	15	1,301 ± 0,277 a		0,916 ± 0,07 ab
	18	1,082 ± 0,523 ab		1,226 ± 0,166 ab
Quercetin glycosides	1	0,881 ± 0,206 de		1,041 ± 0,249 d
	3	1,983 ± 0,314 a		1,035 ± 0,102 d
	6	0,932 ± 0,105 de		0,695 ± 0,102 e
	15	1,38 ± 0,312 bc		0,873 ± 0,065 de
	18	1,248 ± 0,365 b		1,136 ± 0,167 cd
Total analyzed flavonol derivatives	1	0,986 ± 0,17 def		0,901 ± 0,188 def
	3	1,702 ± 0,227 a		0,959 ± 0,132 def
	6	1,091 ± 0,13 de		0,767 ± 0,125 f
	15	1,401 ± 0,282 bc		0,821 ± 0,077 ef
	18	1,472 ± 0,26 ab		1,174 ± 0,134 cd

## Sheet: Table S3
Table S3: Amount (µg/g) of hydroxycinnamic acids in the stem tissues of susceptible (CE-S; Celeia stems) and resistant (WT-S; Wye Target stems) hop cultivars. Data were analyzed by one-way ANOVA and Duncan’s post poc test. Data are presented as mean ± SD. Different letters (bolded values) denote statistically significant differences between infected and control samples at p ≤ 0.05.
Hydroxycinnamic acids	dpi	CE-S			WT-S
		C	I		C	I
Caffeic acid sinapoyl hexoside	1	4,646 ± 0,355 abcd	3,897 ± 0,546 bcdefg		2,549 ± 0,968 fg	3,727 ± 1,359 bcdefg
	3	4,071 ± 0,349 bcdefg	5,742 ± 1,157 a		2,958 ± 0,607 defg	4,341 ± 1,011 abcde
	6	3,109 ± 0,95 defg	4,223 ± 1,147 abcdefg		4,289 ± 1,846 abcdef	2,757 ± 0,638 eg
	15	5,192 ± 0,93 ab	4,954 ± 1,817 abc		3,273 ± 0,497 defg	3,845 ± 0,742 bcdefg
	18	3,324 ± 0,157 cdefg	5,948 ± 1,022 a		3,557 ± 0,492 bcdefg	4,491 ± 0,553 abcde
cis-5-caffeoylquinic acid	1	0,329 ± 0,064 bce	0,285 ± 0,012 ace		0,093 ± 0,066 a	0,171 ± 0,036 ab
	3	0,272 ± 0,059 ace	0,44 ± 0,119 de		0,155 ± 0,089 ab	0,235 ± 0,081 ac
	6	0,184 ± 0,031 ac	0,225 ± 0,129 ac		0,249 ± 0,102 acd	0,164 ± 0,027 ab
	15	0,396 ± 0,073 ce	0,371 ± 0,058 ce		0,227 ± 0,06 ac	0,243 ± 0,012 ac
	18	0,183 ± 0,045 ac	0,454 ± 0,108 e		0,225 ± 0,007 ac	0,294 ± 0,02 ace
Feruloylquinic acid	1	6,402 ± 0,394 abcd	5,845 ± 0,416 bcdef		5,321 ± 0,896 cdef	4,893 ± 1,075 efg
	3	6,109 ± 1,135 bcdef	7,701 ± 0,591 a		4,868 ± 0,125 efg	6,124 ± 1,207 bcdef
	6	5,025 ± 0,47 def	6,999 ± 1,487 ab		5,497 ± 1,664 cdef	3,543 ± 0,33 g
	15	5,931 ± 0,236 bcdef	5,216 ± 0,851 def		6,29 ± 0,349 abcde	5,062 ± 0,544 def
	18	4,695 ± 0,975 fg	4,955 ± 0,575 defg		6,836 ± 0,333 abc	6,291 ± 0,76 abcde
trans-5-caffeoylquinic acid	1	12,215 ± 7,817 abc	16,112 ± 7,422 ab		2,323 ± 0,68 hij	3,228 ± 1,357 ghij
	3	11,276 ± 2,229 abc	19,148 ± 2,583 a		2,258 ± 0,203 ij	4,745 ± 1,937 efgh
	6	7,119 ± 3,334 cde	9,1 ± 1,719 bcd		4,231 ± 2,52 fghi	1,616 ± 0,465 j
	15	20,031 ± 0,579 a	14,235 ± 1,695 ab		5,667 ± 0,994 cdefg	4,865 ± 1,324 defg
	18	15,671 ± 6,959 ab	15,75 ± 10,292 ab		6,479 ± 0,784 cdef	6,333 ± 1,563 cdefg
3-caffeoylquinic acid	1	5,351 ± 1,544 abc	6,932 ± 3,206 a		0,958 ± 0,274 gh	1,186 ± 0,353 fgh
	3	3,373 ± 1,398 bcd	8,006 ± 1,594 a		0,776 ± 0,35 h	2,184 ± 1,212 def
	6	1,992 ± 0,921 defg	2,771 ± 0,648 bcde		1,689 ± 0,92 efg	0,768 ± 0,072 h
	15	10,263 ± 1,327 a	7,242 ± 0,983 a		2,363 ± 0,591 def	1,71 ± 0,769 defg
	18	5,9 ± 3,096 ab	7,451 ± 3,492 a		3,019 ± 1,105 bcde	2,67 ± 1,207 cde
3-p-coumaroylquinic acid	1	9,117 ± 5,834 abc	12,025 ± 5,539 ab		1,734 ± 0,508 hij	2,409 ± 1,013 ghij
	3	8,416 ± 1,664 abc	14,291 ± 1,928 a		1,685 ± 0,151 ij	3,542 ± 1,446 efgh
	6	5,313 ± 2,488 cde	6,792 ± 1,283 bcd		3,158 ± 1,881 fghi	1,206 ± 0,347 j
	15	14,949 ± 0,432 a	10,624 ± 1,265 ab		4,229 ± 0,742 cdefg	3,631 ± 0,988 defg
	18	11,695 ± 5,194 ab	11,755 ± 7,681 ab		4,835 ± 0,585 cdef	4,727 ± 1,167 cdefg
4-caffeoylquinic acid	1	3,473 ± 0,214 abcd	3,172 ± 0,226 bcdef		2,887 ± 0,486 cdef	2,655 ± 0,583 efg
	3	3,315 ± 0,616 bcdef	4,178 ± 0,321 a		2,641 ± 0,068 efg	3,323 ± 0,655 bcdef
	6	2,727 ± 0,255 def	3,797 ± 0,807 ab		2,982 ± 0,903 cdef	1,922 ± 0,179 g
	15	3,218 ± 0,128 bcdef	2,83 ± 0,462 def		3,413 ± 0,19 abcde	2,746 ± 0,295 def
	18	2,548 ± 0,529 fg	2,689 ± 0,312 defg		3,709 ± 0,18 abc	3,413 ± 0,413 abcde
4-p-coumaroylquinic acid	1	1,478 ± 1,21 bcd	1,903 ± 0,082 abcd		2,033 ± 0,642 abc	1,386 ± 0,346 bcd
	3	1,485 ± 0,832 bcd	1,489 ± 0,176 bcd		1,134 ± 0,659 cd	1,25 ± 0,512 cd
	6	1,254 ± 0,06 cd	1,641 ± 0,299 abcd		1,172 ± 0,565 cd	0,874 ± 0,162 d
	15	2,592 ± 0,121 a	1,987 ± 0,305 abc		1,631 ± 0,237 abcd	1,86 ± 0,877 abcd
	18	1,263 ± 0,584 cd	2,075 ± 1,08 abc		2,227 ± 0,968 abc	2,292 ± 0,8 ab
5-p-coumaroylquinic acid	1	1,872 ± 0,443 a	1,223 ± 0,187 abcdef		0,524 ± 0,238 f	1,348 ± 0,59 abcde
	3	1,179 ± 0,231 abcdef	1,86 ± 0,64 a		0,909 ± 0,225 cdef	1,586 ± 0,438 abc
	6	0,85 ± 0,198 def	1,261 ± 0,337 abcdef		1,844 ± 1,18 a	1 ± 0,314 bcdef
	15	1,619 ± 0,288 abc	1,533 ± 0,478 abcd		1,705 ± 0,026 ab	1,782 ± 0,232 a
	18	0,764 ± 0,28 ef	1,869 ± 0,656 a		1,691 ± 0,056 abc	1,998 ± 0,259 a
Total analyzed hydroxycinnamic acids	1	37,808 ± 4,603 defg	51,394 ± 16,577 abc		18,423 ± 4,416 jkl	21,003 ± 5,764 ijkl
	3	39,497 ± 5,848 cdef	62,855 ± 4,711 ab		17,386 ± 1,811 kl	27,33 ± 7,72 fghij
	6	27,574 ± 7,505 fghij	36,81 ± 6,205 defg		25,11 ± 11,11 hijk	13,852 ± 1,386 l
	15	64,191 ± 0,908 a	48,992 ± 5,61 bcd		28,798 ± 3,434 fghij	25,743 ± 5,169 ghijk
	18	42,915 ± 12,037 cde	39,542 ± 6,37 cdef		32,578 ± 3,772 efgh	32,509 ± 6,121 efghi

## Sheet: Table S3.1
Table S3.1: Fold changes (infected/control) of analyzed hydroxycinnamic acids in the stems (S) of susceptible (CE; Celeia) and resistant (WT; Wye Target) hop cultivars. Data were analyzed by one-way ANOVA and Duncan’s post hoc test. Different letters (bolded values) denote statistically significant differences between hop cultivars or sampling times (dpi) at p ≤ 0.05. Data are presented as mean ±…
Hydroxycinnamic acids	dpi	CE-S		WT-S
Caffeic acid sinapoyl hexoside	1	0,839 ± 0,117 de		1,462 ± 0,533 ab
	3	1,41 ± 0,284 abc		1,467 ± 0,342 ab
	6	1,358 ± 0,369 abc		0,643 ± 0,149 e
	15	0,954 ± 0,35 cde		1,175 ± 0,227 bcd
	18	1,79 ± 0,308 a		1,263 ± 0,155 bcd
cis-5-caffeoylquinic acid	1	0,868 ± 0,038 de		1,834 ± 0,388 ab
	3	1,619 ± 0,437 abc		1,511 ± 0,524 bc
	6	1,223 ± 0,699 cd		0,66 ± 0,11 e
	15	0,937 ± 0,146 de		1,067 ± 0,051 cd
	18	2,479 ± 0,591 a		1,303 ± 0,088 bcd
Feruloylquinic acid	1	0,913 ± 0,065 bc		0,92 ± 0,202 bc
	3	1,261 ± 0,097 a		1,258 ± 0,248 a
	6	1,393 ± 0,296 a		0,645 ± 0,06 d
	15	0,88 ± 0,144 bc		0,805 ± 0,086 cd
	18	1,055 ± 0,123 ab		0,92 ± 0,111 bc
trans-5-caffeoylquinic acid	1	1,319 ± 0,608 bc		1,39 ± 0,584 bc
	3	1,698 ± 0,229 b		2,101 ± 0,858 a
	6	1,278 ± 0,241 bc		0,382 ± 0,11 e
	15	0,711 ± 0,085 de		0,858 ± 0,234 cde
	18	1,005 ± 0,657 de		0,978 ± 0,241 cd
3-caffeoylquinic acid	1	1,295 ± 0,599 bcd		1,238 ± 0,369 bcd
	3	2,373 ± 0,473 a		2,813 ± 1,561 ab
	6	1,391 ± 0,326 abc		0,455 ± 0,043 f
	15	0,706 ± 0,096 de		0,724 ± 0,325 ef
	18	1,263 ± 0,592 bcd		0,884 ± 0,4 cde
3-p-coumaroylquinic acid	1	1,319 ± 0,608 bc		1,39 ± 0,584 bc
	3	1,698 ± 0,229 b		2,101 ± 0,858 a
	6	1,278 ± 0,241 bc		0,382 ± 0,11 e
	15	0,711 ± 0,085 de		0,858 ± 0,234 cde
	18	1,005 ± 0,657 de		0,978 ± 0,241 cd
4-caffeoylquinic acid	1	0,913 ± 0,065 cd		0,92 ± 0,202 cd
	3	1,261 ± 0,097 b		1,258 ± 0,248 b
	6	1,393 ± 0,296 a		0,645 ± 0,06 e
	15	0,88 ± 0,144 cd		0,805 ± 0,086 de
	18	1,055 ± 0,123 bc		0,92 ± 0,111 cd
4-p-coumaroylquinic acid	1	1,288 ± 0,056 ab		0,682 ± 0,17 e
	3	1,002 ± 0,118 bcd		1,102 ± 0,451 cde
	6	1,308 ± 0,238 ab		0,746 ± 0,138 de
	15	0,766 ± 0,118 de		1,14 ± 0,538 a
	18	1,642 ± 0,854 abc		1,029 ± 0,359 abc
5-p-coumaroylquinic acid	1	0,654 ± 0,1 fg		2,572 ± 1,125 a
	3	1,578 ± 0,543 bcd		1,744 ± 0,482 bc
	6	1,485 ± 0,397 cd		0,542 ± 0,17 g
	15	0,947 ± 0,295 ef		1,045 ± 0,136 de
	18	2,446 ± 0,858 ab		1,182 ± 0,153 cde
Total analyzed hydroxycinnamic acids	1	1,359 ± 0,438 bc		1,14 ± 0,313 cd
	3	1,591 ± 0,119 ab		1,572 ± 0,444 a
	6	1,335 ± 0,225 bc		0,552 ± 0,055 f
	15	0,763 ± 0,087 ef		0,894 ± 0,179 def
	18	0,859 ± 0,138 def		0,998 ± 0,188 cde
